# Supplementary material
Source: Royal Society of Chemistry journal article supplement (doi:10.1039/d5nr05277g)
Supplement: d5nr05277g1.pdf [file d5nr05277g1.pdf]

**Supplementary Information**

**Precursor Effects and Formation Mechanism of Polyol-Synthesized Thermoelectric Bi<sub>2</sub>Te<sub>3</sub>**

Madison Donohoe<sup>‡1</sup>, ORCID: 0009-0006-5888-260X

Tristan Licskai<sup>‡1</sup>, ORCID: 0009-0002-1366-7587

Ehsan Niknam<sup>1</sup>, ORCID: 0000-0003-1020-9046

Abdeljalil Assoud<sup>1</sup>, ORCID: 0000-0001-6401-8478

Tianze Zou<sup>2</sup>, ORCID: 0000-0002-5237-6232

Jan Kycia<sup>2</sup>, ORCID: 0000-0002-2481-5170

Holger Kleinke<sup>1\*</sup>, ORCID: 0000-0002-6777-6140

<sup>‡</sup>These authors contributed equally.

<sup>1</sup>Department of Chemistry and Waterloo Institute for Nanotechnology, University of Waterloo,  
Waterloo, Ontario N2L 3G1, Canada.

<sup>2</sup>Department of Physics and Astronomy and Institute for Quantum Computing, University of  
Waterloo, Waterloo, Ontario, N2L 3G1, Canada.

Themed Collection: *Thermoelectric Energy Conversion*

**\*Correspondence to:** Prof. Holger Kleinke, Department of Chemistry, University of Waterloo,  
200 University Ave W., Waterloo, Ontario N2L 3G1, Canada. E-mail: [kleinke@uwaterloo.ca](mailto:kleinke@uwaterloo.ca).

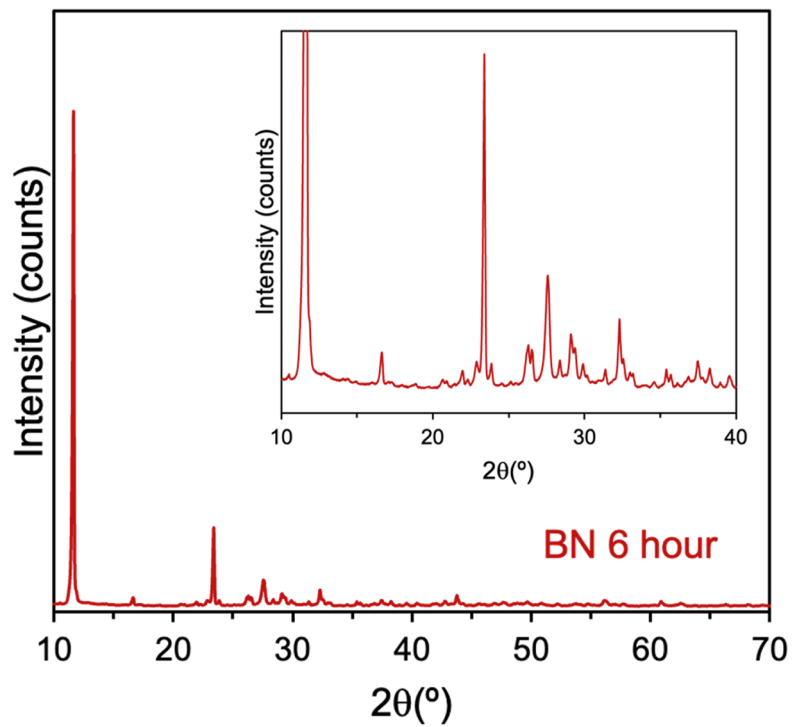

**Figure S1.** PXRD Pattern from  $10^\circ$ – $70^\circ$  and magnified from  $10^\circ$ – $40^\circ$  for  $\text{Bi}_3(\text{C}_2\text{H}_4\text{O}_2)_4\text{NO}_3$  (6-hour aliquot).

**Table S1.** Atomic coordinates and equivalent isotropic displacement parameters for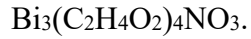

| Atom  | Wyckoff Position | <i>x</i>  | <i>y</i>  | <i>z</i>   | <i>U</i> (Å <sup>2</sup> ) |
|-------|------------------|-----------|-----------|------------|----------------------------|
| Bi(1) | 4e               | 0.7179(1) | 0.2010(1) | 0.1973(1)  | 0.014(1)                   |
| Bi(2) | 4e               | 0.9667(1) | 0.2399(1) | 0.4513(1)  | 0.015(1)                   |
| Bi(3) | 4e               | 0.2173(1) | 0.2872(1) | 0.2055(1)  | 0.014(1)                   |
| C(1)  | 4e               | 0.7169(9) | 0.3954(4) | 0.4409(4)  | 0.021(1)                   |
| C(2)  | 4e               | 0.6294(8) | 0.3424(4) | 0.3590(4)  | 0.021(1)                   |
| C(3)  | 4e               | 0.1325(8) | 0.1032(4) | 0.2762(5)  | 0.026(1)                   |
| C(4)  | 4e               | 0.3278(9) | 0.1178(4) | 0.3111(5)  | 0.029(2)                   |
| C(5)  | 4e               | 0.2975(8) | 0.1487(4) | 0.0350(4)  | 0.021(1)                   |
| C(6)  | 4e               | 0.2096(8) | 0.1032(4) | -0.0527(4) | 0.019(1)                   |
| C(7)  | 4e               | 0.7971(8) | 0.3848(4) | 0.1234(4)  | 0.021(1)                   |
| C(8)  | 4e               | 0.6060(8) | 0.3674(4) | 0.0866(4)  | 0.024(1)                   |
| H(1A) | 4e               | 0.8050    | 0.4349    | 0.4153     | 0.025                      |
| H(1B) | 4e               | 0.6268    | 0.4306    | 0.4712     | 0.025                      |
| H(2A) | 4e               | 0.5261    | 0.3111    | 0.3814     | 0.025                      |
| H(2B) | 4e               | 0.5893    | 0.3810    | 0.3061     | 0.025                      |
| H(3A) | 4e               | 0.1278    | 0.0746    | 0.2131     | 0.032                      |
| H(3B) | 4e               | 0.0739    | 0.0653    | 0.3215     | 0.032                      |
| H(4A) | 4e               | 0.3333    | 0.1343    | 0.3792     | 0.035                      |
| H(4B) | 4e               | 0.3948    | 0.0636    | 0.3046     | 0.035                      |
| H(5A) | 4e               | 0.3294    | 0.1059    | 0.0852     | 0.026                      |
| H(5B) | 4e               | 0.4060    | 0.1784    | 0.0171     | 0.026                      |
| H(6A) | 4e               | 0.2980    | 0.0683    | -0.0845    | 0.022                      |
| H(6B) | 4e               | 0.1161    | 0.0640    | -0.0322    | 0.022                      |
| H(7A) | 4e               | 0.8557    | 0.4231    | 0.0785     | 0.026                      |
| H(7B) | 4e               | 0.7978    | 0.4137    | 0.1862     | 0.026                      |
| H(8A) | 4e               | 0.5358    | 0.4209    | 0.0905     | 0.029                      |
| H(8B) | 4e               | 0.6042    | 0.3490    | 0.0192     | 0.029                      |
| O(1)  | 4e               | 0.8018(6) | 0.3391(3) | 0.5113(3)  | 0.022(1)                   |
| O(2)  | 4e               | 0.7585(5) | 0.2818(3) | 0.3265(3)  | 0.018(1)                   |
| O(3)  | 4e               | 0.0418(5) | 0.1856(3) | 0.2693(3)  | 0.017(1)                   |
| O(4)  | 4e               | 0.4055(5) | 0.1849(3) | 0.2558(3)  | 0.019(1)                   |
| O(5)  | 4e               | 0.1743(5) | 0.2103(3) | 0.0699(3)  | 0.021(1)                   |
| O(6)  | 4e               | 0.1344(6) | 0.1668(3) | -0.1185(2) | 0.022(1)                   |
| O(7)  | 4e               | 0.8919(5) | 0.3028(3) | 0.1321(3)  | 0.017(1)                   |
| O(8)  | 4e               | 0.5296(5) | 0.3002(3) | 0.1441(3)  | 0.019(1)                   |
| O(9)  | 4e               | 0.2929(9) | 0.4837(4) | 0.2343(3)  | 0.056(2)                   |
| O(10) | 4e               | 0.2576(7) | 0.5895(3) | 0.1318(3)  | 0.036(1)                   |
| O(11) | 4e               | 0.2017(7) | 0.4547(4) | 0.0870(4)  | 0.044(1)                   |
| N(1)  | 4e               | 0.2499(7) | 0.5091(4) | 0.1506(4)  | 0.028(1)                   |

**Table S2.** Bond lengths for Bi<sub>3</sub>(C<sub>2</sub>H<sub>4</sub>O<sub>2</sub>)<sub>4</sub>NO<sub>3</sub>.

| <b>Atom Pair</b> | <b>Distance (Å)</b> | <b>Atom Pair</b> | <b>Distance (Å)</b> |
|------------------|---------------------|------------------|---------------------|
| Bi(1)-O(1)       | 2.737(4)            | C(3)-H(3B)       | 0.97                |
| Bi(1)-O(2)       | 2.171(4)            | C(4)-H(4A)       | 0.97                |
| Bi(1)-O(3)       | 2.576(4)            | C(4)-H(4B)       | 0.97                |
| Bi(1)-O(4)       | 2.516(4)            | C(5)-C(6)        | 1.513(8)            |
| Bi(1)-O(7)       | 2.237(4)            | C(5)-H(5A)       | 0.97                |
| Bi(1)-O(8)       | 2.164(4)            | C(5)-H(5B)       | 0.97                |
| Bi(2)-O(1)       | 2.139(4)            | C(6)-H(6A)       | 0.97                |
| Bi(2)-O(2)       | 2.346(4)            | C(6)-H(6B)       | 0.97                |
| Bi(2)-O(3)       | 2.725(4)            | C(7)-C(8)        | 1.512(8)            |
| Bi(2)-O(5)       | 2.320(4)            | C(7)-H(7A)       | 0.97                |
| Bi(2)-O(6)       | 2.150(4)            | C(7)-H(7B)       | 0.97                |
| Bi(2)-O(7)       | 2.659(4)            | C(8)-H(8A)       | 0.97                |
| Bi(3)-O(3)       | 2.233(4)            | C(8)-H(8B)       | 0.97                |
| Bi(3)-O(4)       | 2.184(4)            | O(1)-C(1)        | 1.418(7)            |
| Bi(3)-O(5)       | 2.214(4)            | O(2)-C(2)        | 1.421(7)            |
| Bi(3)-O(6)       | 2.626(4)            | O(3)-C(3)        | 1.424(7)            |
| Bi(3)-O(7)       | 2.594(4)            | O(4)-C(4)        | 1.415(7)            |
| Bi(3)-O(8)       | 2.526(4)            | O(5)-C(5)        | 1.413(7)            |
| C(1)-C(2)        | 1.507(8)            | O(6)-C(6)        | 1.421(6)            |
| C(1)-H(1A)       | 0.97                | O(7)-C(7)        | 1.434(7)            |
| C(1)-H(1B)       | 0.97                | O(8)-C(8)        | 1.428(7)            |
| C(2)-H(2A)       | 0.97                | N(1)-O(9)        | 1.242(7)            |
| C(2)-H(2B)       | 0.97                | N(1)-O(11)       | 1.244(7)            |
| C(3)-C(4)        | 1.527(9)            | N(1)-O(10)       | 1.250(7)            |
| C(3)-H(3A)       | 0.97                |                  |                     |

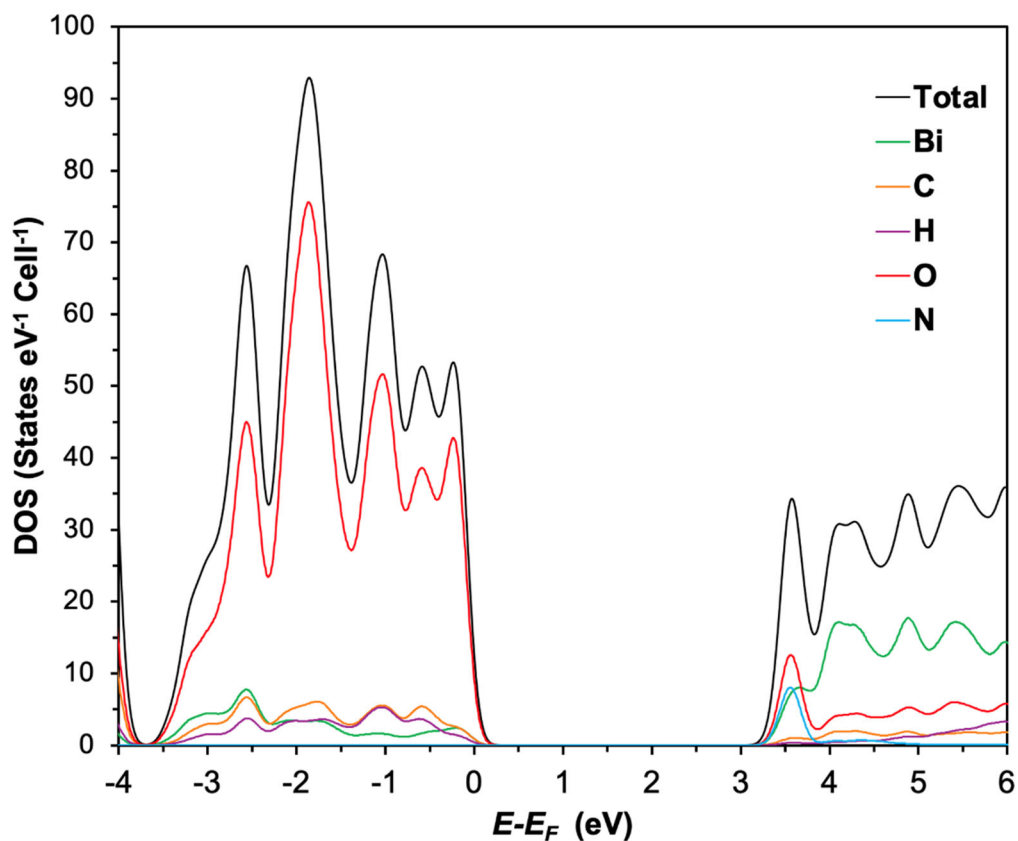

**Figure S2.** Density Of States (DOS) of  $\text{Bi}_3(\text{C}_2\text{H}_4\text{O}_2)_4\text{NO}_3$ .

**Table S3.** Diameter and thickness of hot-pressed  $\text{Bi}_2\text{Te}_3$  pellets from  $\text{Bi}_2\text{O}_3$  (BO) and  $\text{Bi}(\text{NO}_3)_3 \cdot 5\text{H}_2\text{O}$  (BN).

| Sample                                                                                  | Diameter | Thickness |
|-----------------------------------------------------------------------------------------|----------|-----------|
| $\text{Bi}_2\text{Te}_3$ from $\text{Bi}_2\text{O}_3$ (BO)                              | 12.7 mm  | 6.57 mm   |
| $\text{Bi}_2\text{Te}_3$ from $\text{Bi}(\text{NO}_3)_3 \cdot 5\text{H}_2\text{O}$ (BN) | 12.7 mm  | 6.40 mm   |

**Table S4.** PXRD unit cell refinement results for BO and BN in hot-pressed pellet form.

| Sample                | $a$ (Å)    | $c$ (Å)    | $V$ (Å <sup>3</sup> ) |
|-----------------------|------------|------------|-----------------------|
| Hot-pressed BO pellet | 4.38029(2) | 30.4174(1) | 505.43(4)             |
| Hot-pressed BN pellet | 4.37983(2) | 30.4697(6) | 506.19(4)             |

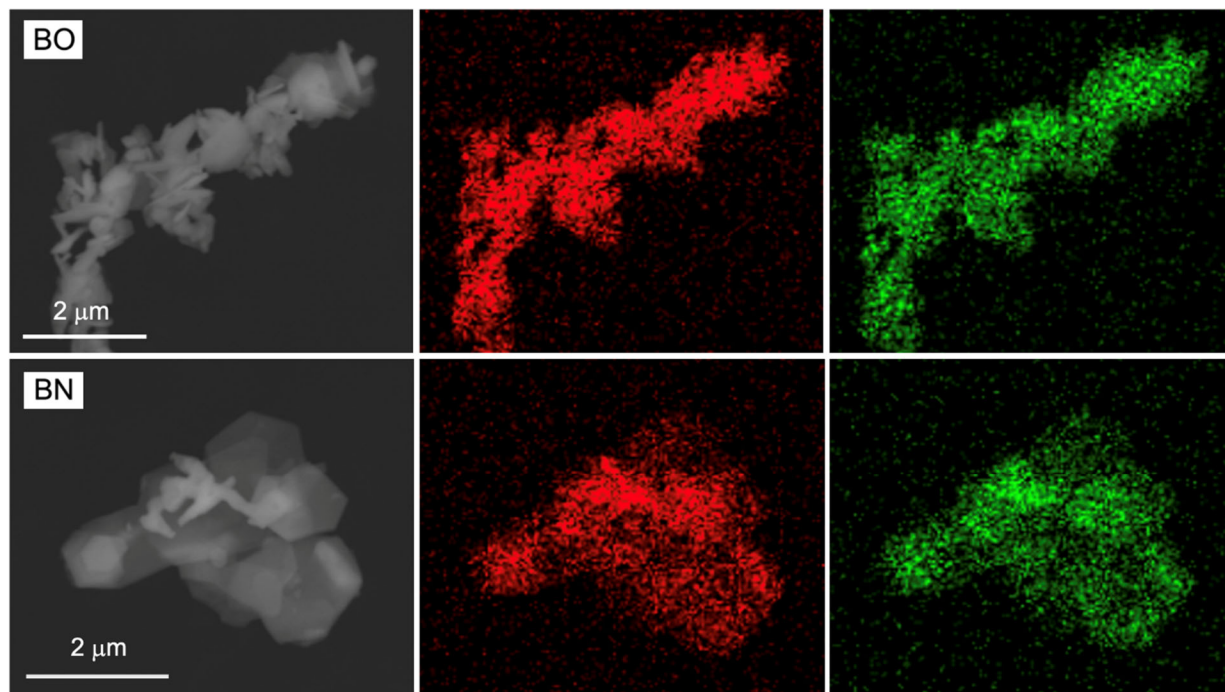

**Figure S3.** SEM-EDS maps for BO and BN with Bi in red and Te in green.

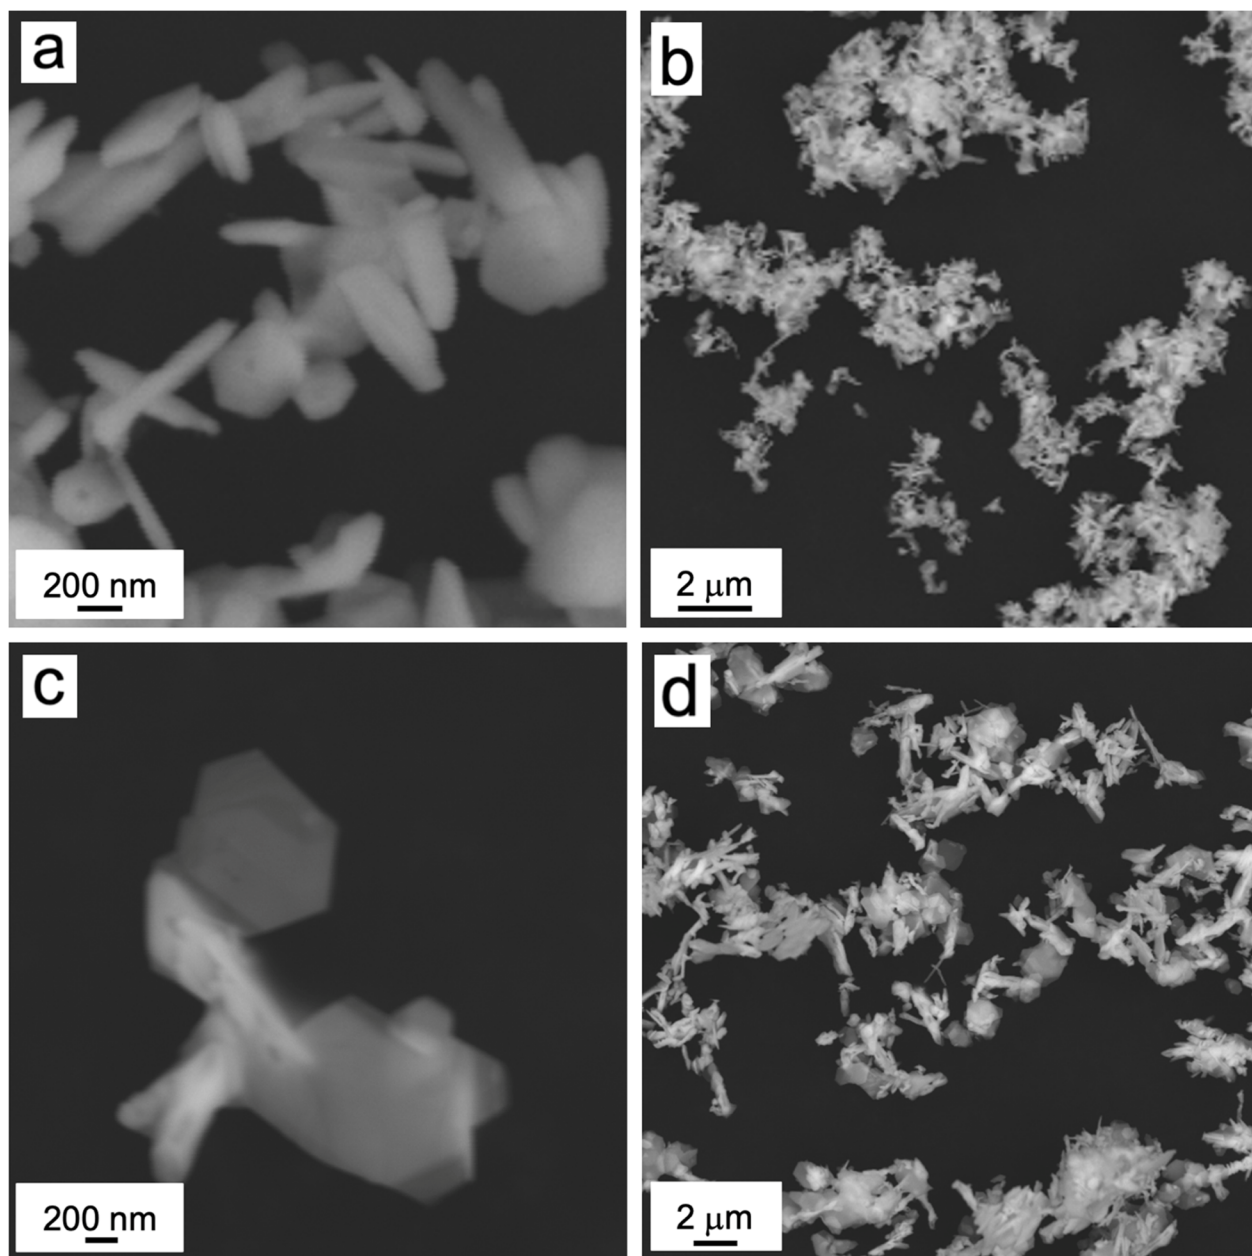

**Figure S4.** SEM images for a) BO at 200 nm, b) BO at 2 μm, c) BN at 200 nm, and d) BN at 2 μm.

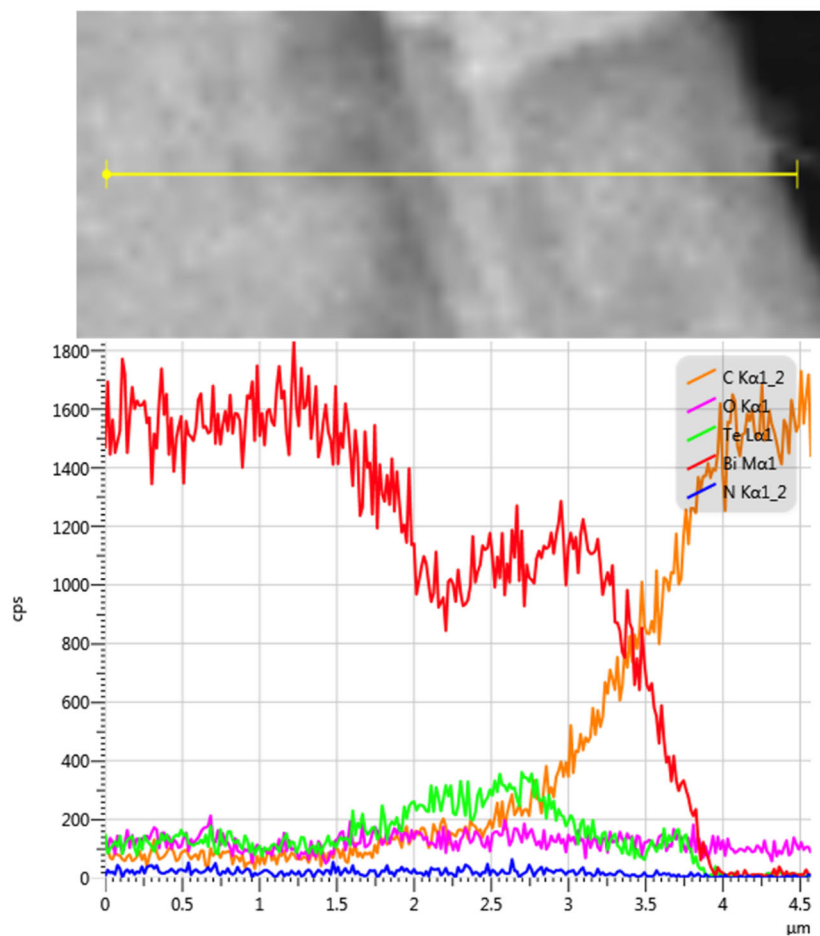

**Figure S5.** SEM-EDS line image and plot for BN after 9 hours.

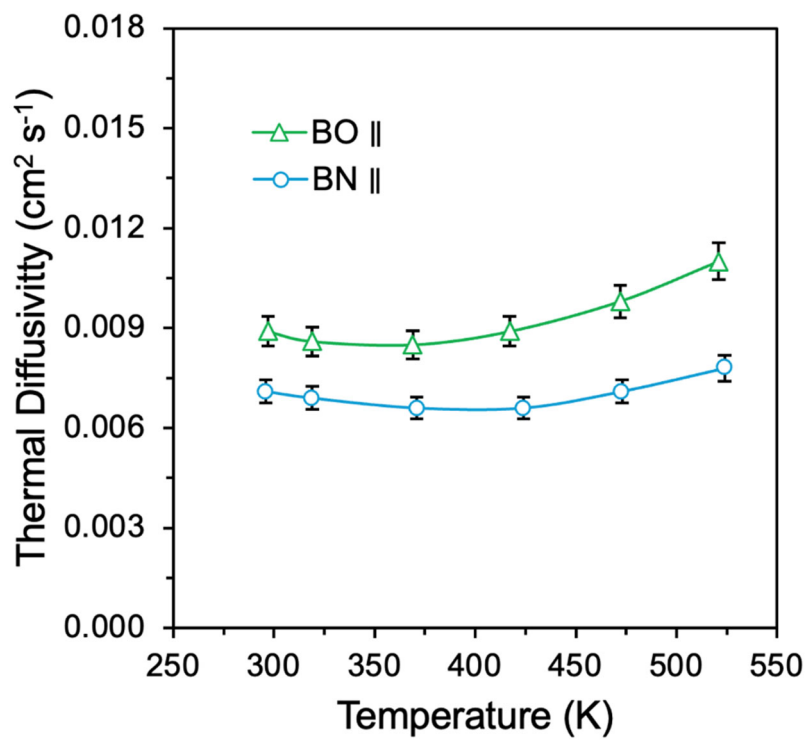

**Figure S6.** Temperature dependence of thermal diffusivity for BO (II) and BN (II).
